# Supplementary material for: YAMAT-seq: an efficient method for high-throughput sequencing of mature transfer RNAs
Source: PubMed Central journal article supplement — Nucleic Acids Res. 2017 Jan 20;45(9):e70. doi: 10.1093/nar/gkx005 (PMC5605243; doi:10.1093/nar/gkx005), 2017-01-20
Supplement: gkx005_supp.pdf [file gkx005_supp.pdf]

## SUPPLEMENTARY INFORMATION

### Supplementary Figure Legends

**Fig. S1. Flow diagram of the YAMAT-seq read numbers of two (R2 and R3) of the triplicate filtered by the indicated sequence analyses.**

**Fig. S2. Scatter plots of tRNA reads per million between two libraries out of triplicates of YAMAT-seq.**

**Fig. S3. Comparison of tRNA levels estimated by Northern blot and YAMAT-seq.**

(A) Synthetic human cyto tRNA<sup>LysCUU</sup>, cyto tRNA<sup>AspGUC</sup>, mt tRNA<sup>AlaUGC</sup>, and mt tRNA<sup>GluUUC</sup> were synthesized by Integrated DNA Technologies and the indicated amounts of the tRNAs and 500 ng of MCF-7 total RNA were subjected to Northern blots using the following 5'-end labeled antisense probes: cyto tRNA<sup>LysCUU</sup>, 5'-GTCTCATGCTCTACCGACT-3'; cyto tRNA<sup>AspGUC</sup>, 5'-GAACCCCGGTCTCCCGCGTGA-3'; mt tRNA<sup>AlaUGC</sup>, 5'-GGACTGCAAACCCCACT-3'; and mt tRNA<sup>GluUUC</sup>, 5'-GGACTACAACCACGACCAAT-3'.

(B) Band intensities of Northern blots were measured using Typhoon 9400 and ImageQuant ver. 5.2 (GE Healthcare). Based on standard curves obtained from dilution series of synthetic RNAs, the amounts of respective tRNAs in MCF-7 total RNA were determined. YAMAT-seq reads per million (the average of triplicate) obtained from MCF-7 cells were plotted against the determined tRNA amounts (the average of three independent Northern blot analyses with bars showing the SD).

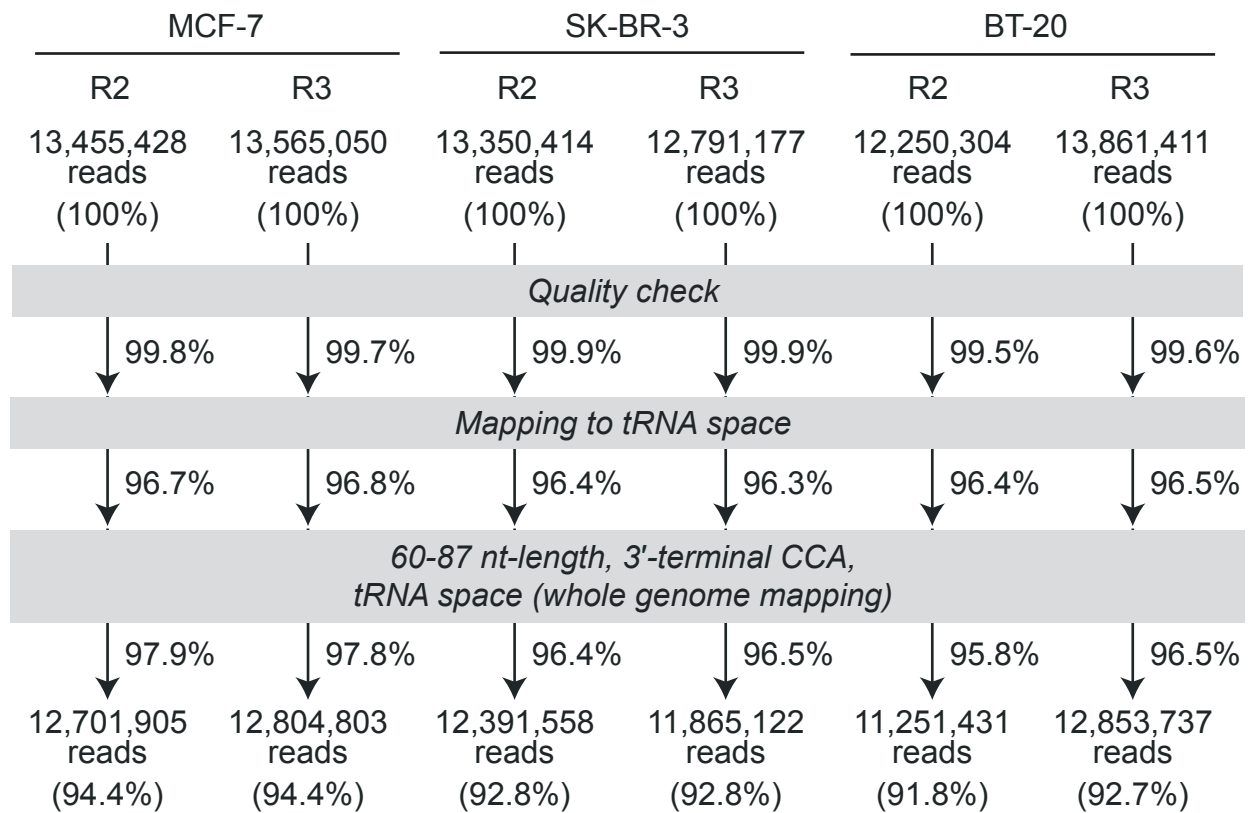

*Shigematsu and Honda et al. Supplementary Figure S1*

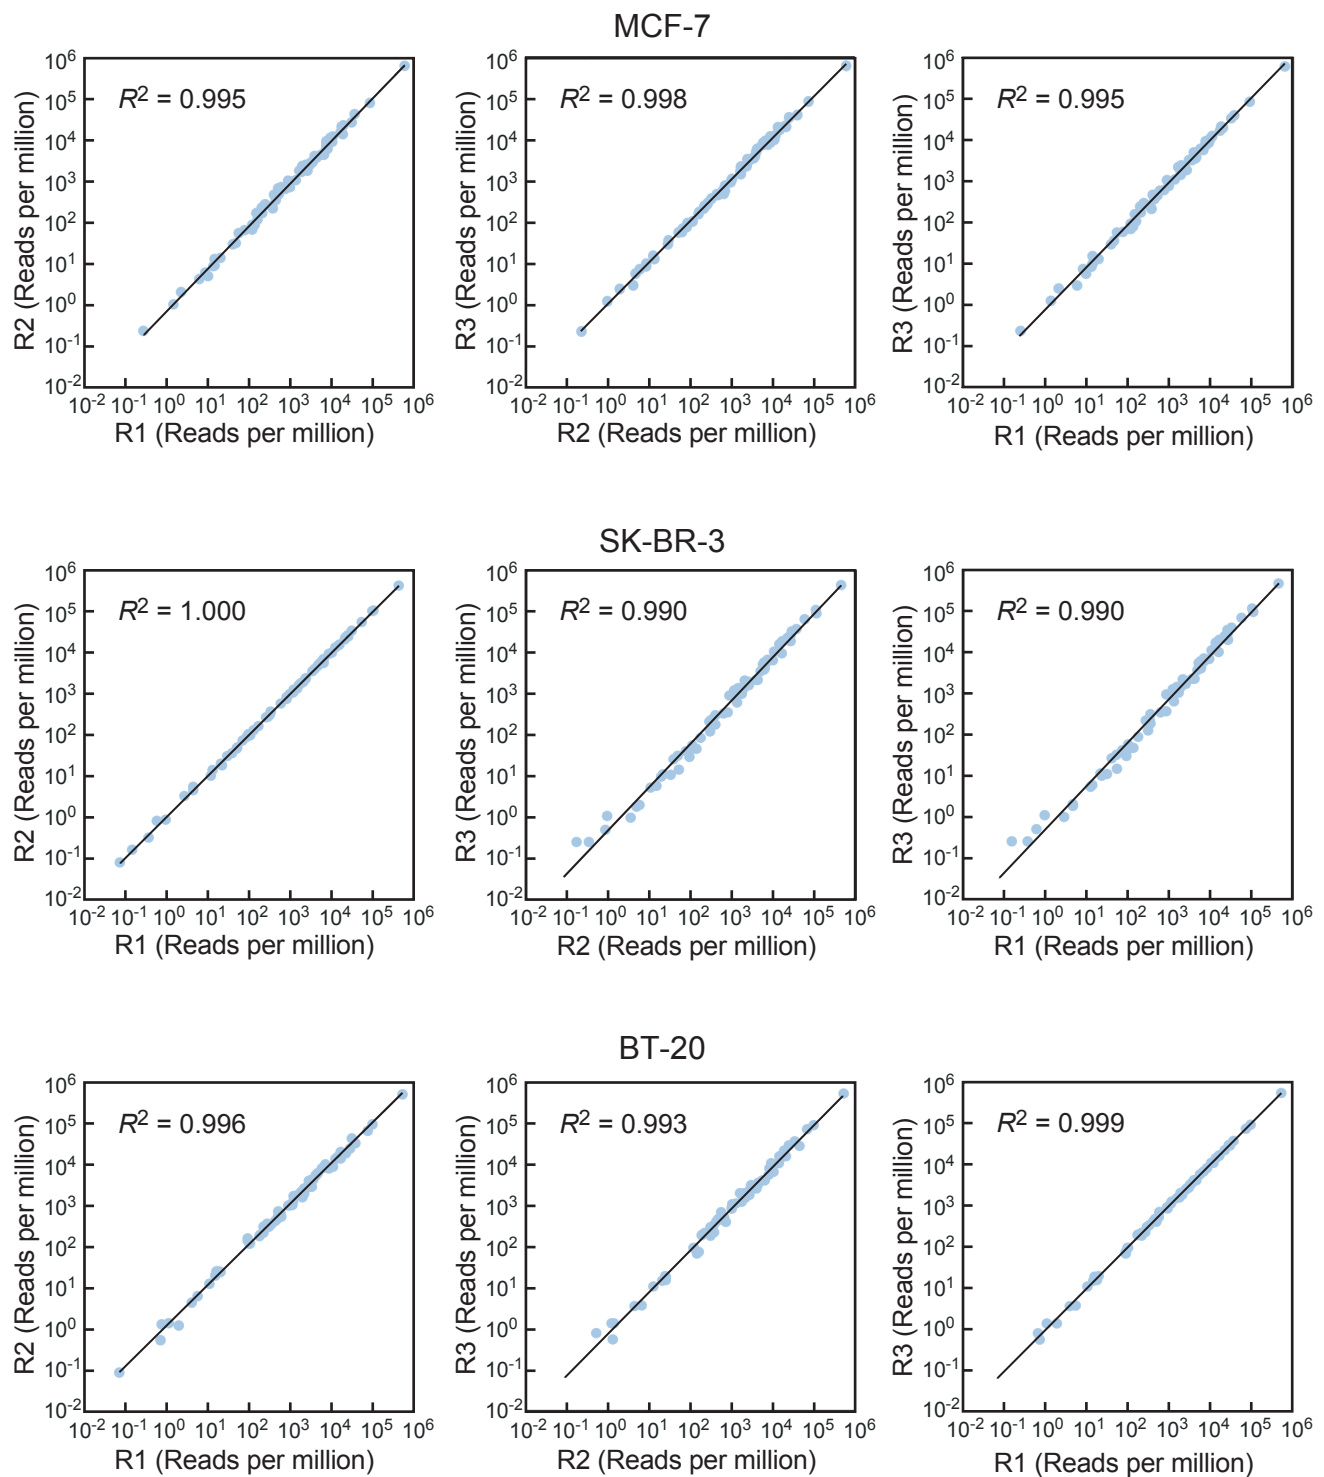

*Shigematsu and Honda et al. Supplementary Figure S2*

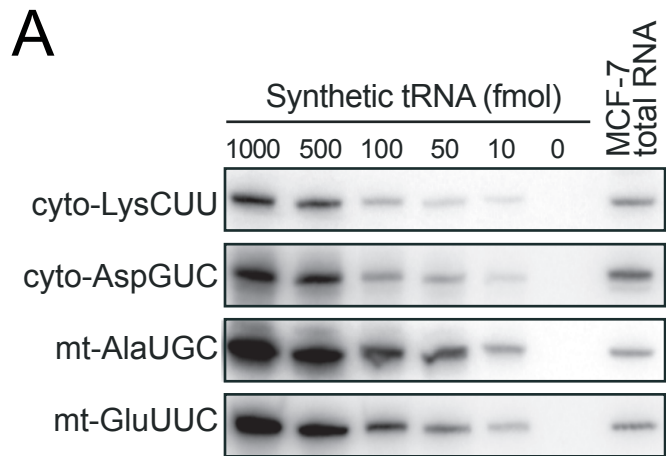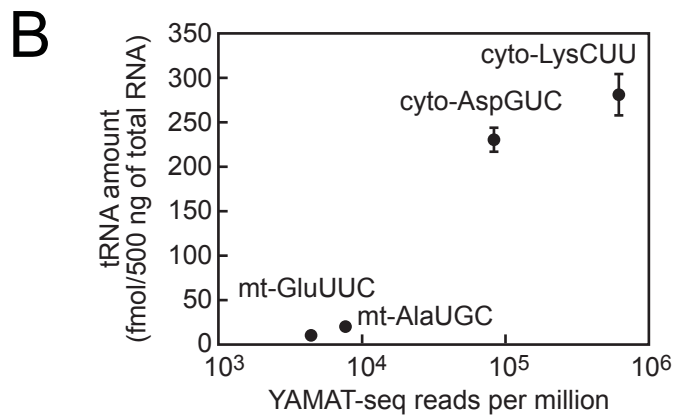

*Shigematsu and Honda et al. Supplementary Figure S3*

**Supplementary Tables**

**Table S1. tRNA species cloned from Bands 1–3 in Fig. 2D.**

| Band 1 (total 22 clones)    |        | Band 2 (total 12 clones)  |        | Band 3 (total 9 clones)   |        |
|-----------------------------|--------|---------------------------|--------|---------------------------|--------|
| tRNA species                | clones | tRNA species              | clones | tRNA species              | clones |
| cyto tRNA <sup>LysCUU</sup> | 7      | mt tRNA <sup>ValUAC</sup> | 4      | mt tRNA <sup>SerGCU</sup> | 7      |
| cyto tRNA <sup>AspGUC</sup> | 6      | mt tRNA <sup>MetCAU</sup> | 3      | mt tRNA <sup>GlnUUG</sup> | 1      |
| cyto tRNA <sup>ValCAC</sup> | 2      | mt tRNA <sup>AspGUC</sup> | 2      | mt tRNA <sup>MetCAU</sup> | 1      |
| cyto tRNA <sup>AsnGUU</sup> | 1      | mt tRNA <sup>GlyUCC</sup> | 2      |                           |        |
| cyto tRNA <sup>GluCUC</sup> | 1      | mt tRNA <sup>LysUUU</sup> | 1      |                           |        |
| cyto tRNA <sup>LeuAAG</sup> | 1      |                           |        |                           |        |
| cyto tRNA <sup>ValAAC</sup> | 1      |                           |        |                           |        |
| mt tRNA <sup>GlyUCC</sup>   | 1      |                           |        |                           |        |
| mt tRNA <sup>ProUGG</sup>   | 1      |                           |        |                           |        |
| mt tRNA <sup>ValUAC</sup>   | 1      |                           |        |                           |        |

**Table S2. YAMAT-seq sequence reads (reads per million) of three cell lines mapped to cyto tRNA isoacceptors**

| Isoacceptors | Gene copy number | MCF-7     |           |           | SK-BR-3   |           |           | BT-20     |           |           |
|--------------|------------------|-----------|-----------|-----------|-----------|-----------|-----------|-----------|-----------|-----------|
|              |                  | R1        | R2        | R3        | R1        | R2        | R3        | R1        | R2        | R3        |
| cyto-AlaAGC  | 29               | 1410.34   | 1085.68   | 1114.99   | 294.82    | 277.64    | 124.91    | 2124.55   | 2673.78   | 1819.54   |
| cyto-AlaCGC  | 5                | 122.00    | 87.73     | 94.82     | 49.99     | 46.52     | 32.29     | 103.79    | 124.78    | 91.57     |
| cyto-AlaUGC  | 9                | 3318.15   | 2910.07   | 3268.92   | 1260.37   | 1196.72   | 1008.02   | 1799.23   | 2152.32   | 1543.28   |
| cyto-ArgACG  | 7                | 122.27    | 67.34     | 69.62     | 52.29     | 49.52     | 14.45     | 99.68     | 119.23    | 92.50     |
| cyto-ArgCCG  | 4                | 2665.45   | 1829.44   | 1853.69   | 1258.86   | 1258.96   | 626.35    | 894.06    | 1010.19   | 883.09    |
| cyto-ArgCCU  | 5                | 993.38    | 721.55    | 759.81    | 605.34    | 595.00    | 340.94    | 1601.25   | 1889.71   | 1490.85   |
| cyto-ArgUCG  | 6                | 769.53    | 661.40    | 607.38    | 331.70    | 323.19    | 215.01    | 464.60    | 480.14    | 463.23    |
| cyto-ArgUCU  | 6                | 3668.10   | 3012.97   | 3297.33   | 2424.52   | 2416.29   | 1624.23   | 2748.34   | 3203.66   | 2631.14   |
| cyto-AsnAUU  | 1                | 0.00      | 0.00      | 0.00      | 0.00      | 0.00      | 0.00      | 0.00      | 0.00      | 0.00      |
| cyto-AsnGUU  | 32               | 4347.12   | 3688.36   | 3626.45   | 108.69    | 99.27     | 46.06     | 580.27    | 659.75    | 517.21    |
| cyto-AspGUC  | 19               | 87232.52  | 78763.43  | 83580.91  | 108711.92 | 107584.51 | 90864.84  | 96779.10  | 97206.19  | 92465.08  |
| cyto-CysGCA  | 30               | 363.65    | 251.98    | 256.83    | 344.81    | 374.16    | 185.77    | 183.49    | 195.71    | 193.68    |
| cyto-GlnCUG  | 20               | 4544.92   | 3878.93   | 3901.57   | 1642.35   | 1633.52   | 1016.30   | 2555.58   | 2802.85   | 2440.51   |
| cyto-GlnUUG  | 11               | 532.85    | 484.67    | 452.12    | 317.72    | 302.77    | 237.07    | 428.90    | 434.17    | 405.96    |
| cyto-GluCUC  | 13               | 19132.66  | 14032.38  | 19600.56  | 15299.31  | 15533.99  | 9755.75   | 16491.84  | 20809.59  | 16075.71  |
| cyto-GluUUC  | 13               | 7452.09   | 5700.78   | 7434.86   | 3567.12   | 3614.63   | 2181.18   | 3322.71   | 4348.73   | 3190.70   |
| cyto-GlyCCC  | 7                | 7779.28   | 6941.14   | 9139.41   | 978.23    | 972.32    | 909.64    | 1193.08   | 1755.45   | 1233.58   |
| cyto-GlyGCC  | 15               | 5761.16   | 4377.43   | 6052.44   | 4815.83   | 4816.05   | 3534.79   | 5661.99   | 8121.71   | 5595.51   |
| cyto-GlyUCC  | 9                | 32270.64  | 26478.61  | 34009.45  | 26060.10  | 25199.39  | 19386.92  | 30281.67  | 43764.87  | 28330.61  |
| cyto-HisGUG  | 11               | 1959.91   | 1766.76   | 1454.32   | 834.82    | 749.46    | 360.12    | 1805.62   | 1884.43   | 1599.38   |
| cyto-IleAAU  | 14               | 80.03     | 65.37     | 59.58     | 20.74     | 20.02     | 11.33     | 14.90     | 20.66     | 14.53     |
| cyto-IleGAU  | 3                | 0.00      | 0.00      | 0.00      | 0.07      | 0.08      | 0.00      | 0.07      | 0.09      | 0.00      |
| cyto-IleUAU  | 5                | 0.27      | 0.24      | 0.24      | 0.00      | 0.00      | 0.00      | 0.00      | 0.00      | 0.00      |
| cyto-LeuAAG  | 12               | 449.12    | 344.61    | 369.23    | 171.57    | 168.08    | 87.56     | 502.22    | 732.56    | 397.75    |
| cyto-LeuCAA  | 7                | 41.02     | 30.03     | 29.51     | 11.88     | 10.29     | 5.32      | 89.93     | 145.53    | 67.74     |
| cyto-LeuCAG  | 10               | 48.81     | 31.30     | 36.42     | 30.40     | 30.80     | 10.99     | 90.82     | 162.52    | 73.60     |
| cyto-LeuUAA  | 7                | 6.31      | 4.27      | 2.98      | 4.47      | 4.62      | 1.86      | 5.49      | 6.53      | 3.67      |
| cyto-LeuUAG  | 3                | 210.76    | 170.41    | 175.51    | 97.89     | 104.70    | 56.96     | 222.62    | 312.16    | 181.81    |
| cyto-LysCUU  | 17               | 612826.57 | 631303.95 | 606849.93 | 436810.62 | 432333.73 | 439956.52 | 529006.66 | 512375.31 | 542050.54 |
| cyto-LysUUU  | 16               | 17214.64  | 15395.26  | 16919.72  | 9007.81   | 9364.01   | 6626.80   | 13595.77  | 15024.81  | 13933.73  |
| cyto-MetCAU  | 20               | 6773.21   | 4362.96   | 5646.79   | 4020.69   | 4081.58   | 2207.98   | 4097.66   | 5500.43   | 4079.11   |
| cyto-PheGAA  | 12               | 10.14     | 4.98      | 5.81      | 22.19     | 18.56     | 9.80      | 17.92     | 25.40     | 15.08     |
| cyto-ProAGG  | 10               | 20.41     | 14.15     | 13.03     | 4.39      | 5.51      | 2.03      | 10.71     | 12.88     | 10.55     |
| cyto-ProCGG  | 4                | 136.70    | 86.86     | 78.89     | 89.39     | 89.71     | 30.17     | 173.74    | 186.85    | 188.68    |
| cyto-ProUGG  | 7                | 380.90    | 223.60    | 215.54    | 130.95    | 131.37    | 47.16     | 297.31    | 313.24    | 294.47    |
| cyto-SeCUCA  | 3                | 153.56    | 167.48    | 158.24    | 340.99    | 374.73    | 303.33    | 333.69    | 360.02    | 327.67    |
| cyto-SerAGA  | 11               | 56.53     | 54.77     | 57.46     | 38.54     | 36.06     | 26.45     | 20.32     | 24.87     | 19.06     |
| cyto-SerCGA  | 4                | 165.51    | 118.32    | 106.20    | 70.30     | 72.85     | 40.65     | 266.69    | 375.22    | 219.00    |
| cyto-SerGCU  | 8                | 14.64     | 13.04     | 15.46     | 2.74      | 3.32      | 1.01      | 3.98      | 4.47      | 3.52      |
| cyto-SerUGA  | 5                | 13.83     | 8.77      | 8.63      | 13.40     | 14.10     | 5.92      | 15.86     | 25.22     | 18.59     |
| cyto-ThrAGU  | 10               | 8.59      | 6.24      | 7.46      | 0.36      | 0.32      | 0.25      | 0.69      | 0.54      | 0.78      |
| cyto-ThrCGU  | 6                | 2.22      | 2.06      | 2.51      | 0.94      | 0.89      | 1.10      | 1.92      | 1.25      | 1.33      |
| cyto-ThrUGU  | 6                | 1947.96   | 1714.52   | 1699.92   | 260.46    | 271.40    | 217.04    | 218.71    | 221.73    | 217.20    |
| cyto-TrpCCA  | 9                | 1.48      | 1.03      | 1.26      | 0.14      | 0.16      | 0.25      | 0.76      | 1.34      | 0.55      |
| cyto-TyrAUA  | 1                | 0.00      | 0.00      | 0.00      | 0.00      | 0.00      | 0.00      | 0.00      | 0.00      | 0.00      |
| cyto-TyrGUA  | 14               | 14.91     | 9.01      | 10.13     | 0.58      | 0.81      | 0.51      | 1.10      | 1.43      | 1.33      |
| cyto-ValAAC  | 11               | 3033.06   | 2534.15   | 3298.59   | 1848.50   | 1846.50   | 1380.57   | 2741.55   | 4030.40   | 2560.91   |
| cyto-ValCAC  | 16               | 8107.88   | 6175.81   | 8257.78   | 5780.59   | 5798.66   | 3969.96   | 6978.90   | 10430.82  | 6567.43   |
| cyto-ValUAC  | 5                | 10855.18  | 9036.16   | 11711.16  | 5789.67   | 6061.63   | 4227.91   | 4147.64   | 5636.21   | 4026.13   |

**Table S3. YAMAT-seq sequence reads (reads per million) of three cell lines mapped to mt tRNA isoacceptors**

| Isoacceptors | MCF-7    |          |          | SK-BR-3   |           |           | BT-20    |          |          |
|--------------|----------|----------|----------|-----------|-----------|-----------|----------|----------|----------|
|              | R1       | R2       | R3       | R1        | R2        | R3        | R1       | R2       | R3       |
| mt-AlaUGC    | 7582.41  | 7927.63  | 7489.57  | 6500.31   | 6450.38   | 5574.50   | 8504.30  | 8166.70  | 8105.79  |
| mt-ArgUCG    | 2025.31  | 2364.77  | 2404.08  | 6691.55   | 7025.20   | 6939.93   | 2117.41  | 1987.11  | 2017.29  |
| mt-AsnGUU    | 9692.73  | 11408.76 | 10055.58 | 12923.99  | 13573.23  | 16209.89  | 10670.18 | 9041.38  | 10947.02 |
| mt-AspGUC    | 913.01   | 1030.67  | 1060.05  | 2369.63   | 2304.70   | 1886.39   | 2593.68  | 2868.51  | 2446.37  |
| mt-CysGCA    | 11084.67 | 12359.04 | 12612.57 | 15958.38  | 15870.63  | 19318.38  | 16554.92 | 16563.63 | 16442.52 |
| mt-GlnUUG    | 19874.86 | 22513.60 | 20123.88 | 21250.90  | 21556.64  | 23065.73  | 28320.70 | 24623.35 | 29186.51 |
| mt-GluUUC    | 4022.15  | 4149.95  | 5039.64  | 6599.43   | 5697.03   | 5897.26   | 3680.29  | 4461.43  | 3616.90  |
| mt-GlyUCC    | 9430.06  | 10781.90 | 10291.30 | 32347.78  | 34894.78  | 38158.73  | 22309.72 | 18952.53 | 22263.28 |
| mt-HisGUG    | 250.65   | 281.85   | 293.49   | 817.97    | 839.98    | 921.22    | 1091.41  | 1055.72  | 1072.16  |
| mt-IleGAU    | 414.61   | 464.99   | 478.02   | 1245.03   | 1278.89   | 1106.23   | 928.72   | 1022.27  | 840.82   |
| mt-LeuUAA    | 1700.33  | 1796.96  | 2201.02  | 5549.23   | 5717.62   | 5815.28   | 4603.52  | 6317.87  | 4026.45  |
| mt-LeuUAG    | 7676.82  | 9288.61  | 8727.09  | 25095.91  | 25655.16  | 26487.18  | 16893.83 | 15565.15 | 16508.54 |
| mt-LysUUU    | 9071.65  | 9537.58  | 8595.14  | 22411.73  | 23306.70  | 22750.90  | 16284.04 | 14502.81 | 16115.01 |
| mt-MetCAU    | 18410.73 | 21149.94 | 20994.76 | 56180.65  | 55653.18  | 66434.95  | 36910.82 | 33949.17 | 36562.03 |
| mt-PheGAA    | 243.73   | 270.63   | 273.63   | 1511.18   | 1356.61   | 1385.13   | 500.98   | 588.64   | 453.62   |
| mt-ProUGG    | 2431.46  | 2499.54  | 2259.97  | 5135.71   | 5354.39   | 5318.24   | 3262.03  | 2944.53  | 3106.09  |
| mt-SerGCU    | 7779.55  | 8911.43  | 9392.86  | 25666.17  | 27031.95  | 33982.72  | 12082.86 | 13988.23 | 10857.88 |
| mt-SerUGA    | 513.71   | 672.15   | 487.13   | 2089.07   | 1947.15   | 2125.57   | 595.79   | 553.67   | 689.10   |
| mt-ThrUGU    | 1002.72  | 995.50   | 956.75   | 2354.94   | 2382.90   | 2004.46   | 3025.67  | 3468.06  | 2704.66  |
| mt-TrpUCA    | 618.05   | 721.79   | 588.70   | 10415.55  | 10216.88  | 10645.02  | 1921.70  | 1605.63  | 2031.82  |
| mt-TyrGUA    | 205.46   | 231.58   | 246.23   | 1183.23   | 1068.35   | 1251.93   | 1149.63  | 1254.38  | 1118.73  |
| mt-ValUAC    | 38035.08 | 42021.11 | 39115.10 | 102172.64 | 102929.25 | 111026.27 | 74020.43 | 66949.50 | 72549.57 |
